# Supplementary material for: Incidence and Determinants of Acute Kidney Injury after Prone Positioning in Severe COVID-19 Acute Respiratory Distress Syndrome
Source: MDPI journal article supplement (doi:10.3390/healthcare11212903), 2023-11-04
Supplement: s1 [file s1]

## Article

# Incidence and Determinants of Acute Kidney Injury after Prone Positioning in Severe COVID-19 Acute Respiratory Distress Syndrome

Riccardo La Rosa <sup>1</sup>, Benedetta Grechi <sup>1</sup>, Riccardo Ragazzi <sup>1,2</sup>, Valentina Alvisi <sup>2</sup>, Giacomo Montanari <sup>2</sup>, Elisabetta Marangoni <sup>2</sup>, Carlo Alberto Volta <sup>1,2</sup>, Savino Spadaro <sup>1,2</sup> and Gaetano Scaramuzzo <sup>1,2,\*</sup>

<sup>1</sup> Department of Translational Medicine and for Romagna, University of Ferrara, 44124 Ferrara, Italy; riccardo.larosa@edu.unife.it (R.L.R.); benedetta.grechi@edu.unife.it (B.G.); riccardo.ragazzi@unife.it (R.R.); vlc@unife.it (C.A.V.); savino.spadaro@unife.it (S.S.)

<sup>2</sup> Anesthesia and Intensive Care Unit, Emergency Department, Azienda Ospedaliera Universitaria Ferrara, 44124 Ferrara, Italy; v.alvisi@ospfe.it (V.A.); g.montanari@ospfe.it (G.M.); e.marangoni@ospfe.it (E.M.)

\* Correspondence: scrgrtn@unife.it

**Table S1. Multivariate regression analysis on predictors of Ventilator-free days (VFDs), censored at 28 days.**

| Variables                                             | OR            | 95% C.I. for OR |               | p-value      |
|-------------------------------------------------------|---------------|-----------------|---------------|--------------|
|                                                       |               | Lower           | Upper         |              |
| Age, in years                                         | -0.127        | -0.326          | 0.099         | 0.290        |
| BMI                                                   | -0.192        | -0.596          | 0.037         | 0.082        |
| <b>Previous story of CKD</b>                          | <b>-0.230</b> | <b>-17.899</b>  | <b>-0.762</b> | <b>0.033</b> |
| SAPS before PP                                        | -0.037        | -0.325          | 0.238         | 0.759        |
| PaO <sub>2</sub> /FiO <sub>2</sub> ratio at admission | 0.134         | -0.008          | 0.044         | 0.173        |
| Days of hospital before ICU                           | 0.021         | 0.000           | 0.000         | 0.851        |
| <b>Days of ICU before 1<sup>st</sup> PP cycle</b>     | <b>-0.334</b> | <b>0.000</b>    | <b>0.000</b>  | <b>0.002</b> |
| Creatinine before PP                                  | 0.124         | -1.745          | 6.266         | 0.265        |
| <b>CVP before PP</b>                                  | <b>0.271</b>  | <b>0.123</b>    | <b>0.936</b>  | <b>0.011</b> |
| AKI development during the 1st PP                     | -0.015        | -3.199          | 2.769         | 0.886        |
| <b>Number of PP cycles</b>                            | <b>-0.308</b> | <b>-3.110</b>   | <b>-0.698</b> | <b>0.002</b> |
| Constant                                              | 21.112        |                 |               | 0.025        |

Data refers to the first pronation cycle for all patients. BMI = body mass index; CFB = cumulative fluid balance; SAPS = Simplified Acute Physiology Score; PP = prone positioning; CKD = chronic kidney disease; ICU = intensive care unit.

**Table S2. Logistic regression analysis on predictors of ICU mortality.**

| Variables                                         | OR           | 95% C.I. for OR |              | p-value      |
|---------------------------------------------------|--------------|-----------------|--------------|--------------|
|                                                   |              | Lower           | Upper        |              |
| Age, in years                                     | 1.096        | 1.000           | 1.203        | 0.051        |
| BMI                                               | 1.095        | 0.968           | 1.239        | 0.151        |
| Previous story of CKD                             | 0.000        | 0.000           | 0.000        | 0.999        |
| SAPS before PP                                    | 1.048        | 0.944           | 1.163        | 0.383        |
| PaO2/FiO2 ratio at admission                      | 0.997        | 0.987           | 1.007        | 0.497        |
| Days of hospital before ICU                       | 1.000        | 1.000           | 1.000        | 0.557        |
| <b>Days of ICU before 1<sup>st</sup> PP cycle</b> | <b>1.000</b> | <b>1.000</b>    | <b>1.000</b> | <b>0.003</b> |
| Creatinine before PP                              | 0.244        | 0.037           | 1.609        | 0.143        |
| <b>CVP before PP</b>                              | <b>0.831</b> | <b>0.699</b>    | <b>0.989</b> | <b>0.037</b> |
| AKI development during the 1st PP                 | 0.468        | 0.134           | 1.637        | 0.235        |
| <b>Number of PP cycles</b>                        | <b>2.823</b> | <b>1.417</b>    | <b>5.622</b> | <b>0.003</b> |
| Constant                                          | 727363.6     |                 |              | 0.051        |

**Data refers to the first pronation cycle for all patients. BMI = body mass index; CFB = cumulative fluid balance; SAPS = Simplified Acute Physiology Score; PP = prone positioning; CKD = chronic kidney disease; ICU = intensive care unit.**
